# Supplementary material
Source: PubMed Central journal article supplement (PMC4609187)
Supplement: embj0034-2574-sd1.pdf [file embj0034-2574-sd1.pdf]

**Table of Contents**

**Appendix Figures**

**Appendix Figure Legends**

**Appendix Supplemental Materials and Methods**

**Appendix Supplemental References**

# Appendix Figure S1

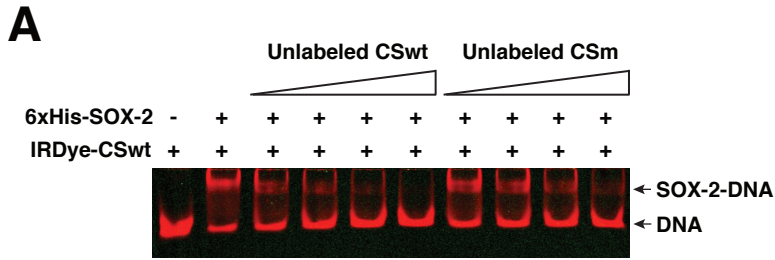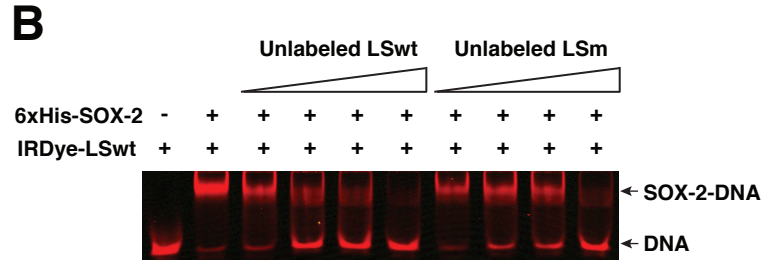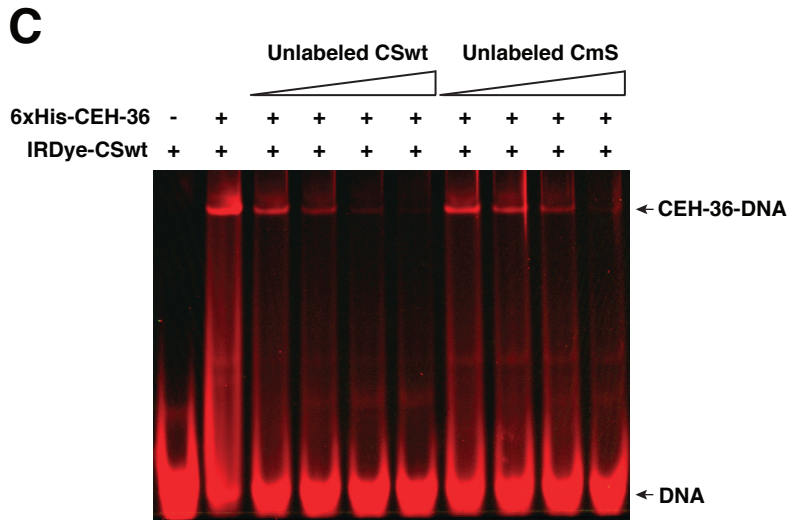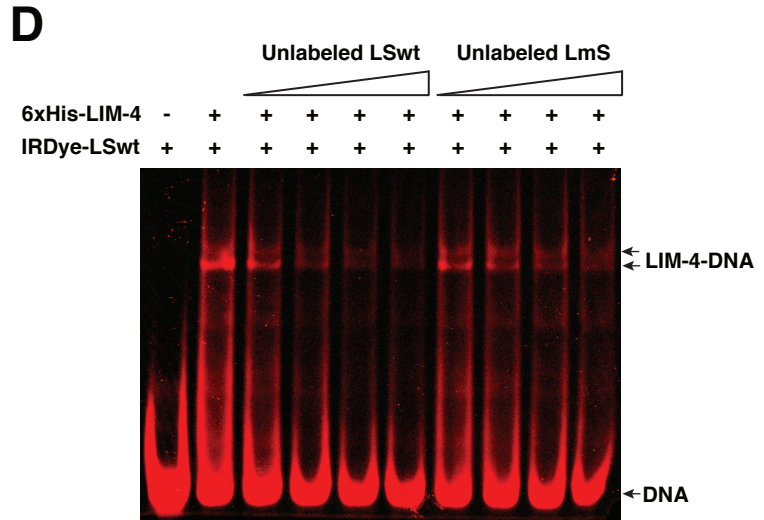

|      | CEH-36 site      | SOX-2 site |                             |
|------|------------------|------------|-----------------------------|
| CSwt | AAAAATCCTACTATAC | TAATCCATG  | TATTCAATTGCAAGCCCACTAGATTGG |
| CSm  | AAAAATCCTACTATAC | TAATCCATG  | CGCGACTTGCAAGCCCACTAGATTGG  |
| CmS  | AAAAATCCTACTATAC | CGCGATG    | TATTCAATTGCAAGCCCACTAGATTGG |

|      | LIM-4 site       | SOX-2 site |                                |
|------|------------------|------------|--------------------------------|
| LSwt | TATCATATCTATTCTA | TGATTA     | AATACCTATTCAATTGCAAAATCTTCTCCC |
| LSm  | TATCATATCTATTCTA | TGATTA     | AATACCGCGACTTTGCAAAATCTTCTCCC  |
| LmS  | TATCATATCTATTCTA | GTCGCT     | AATACCTATTCAATTGCAAAATCTTCTCCC |

# Appendix Figure S2

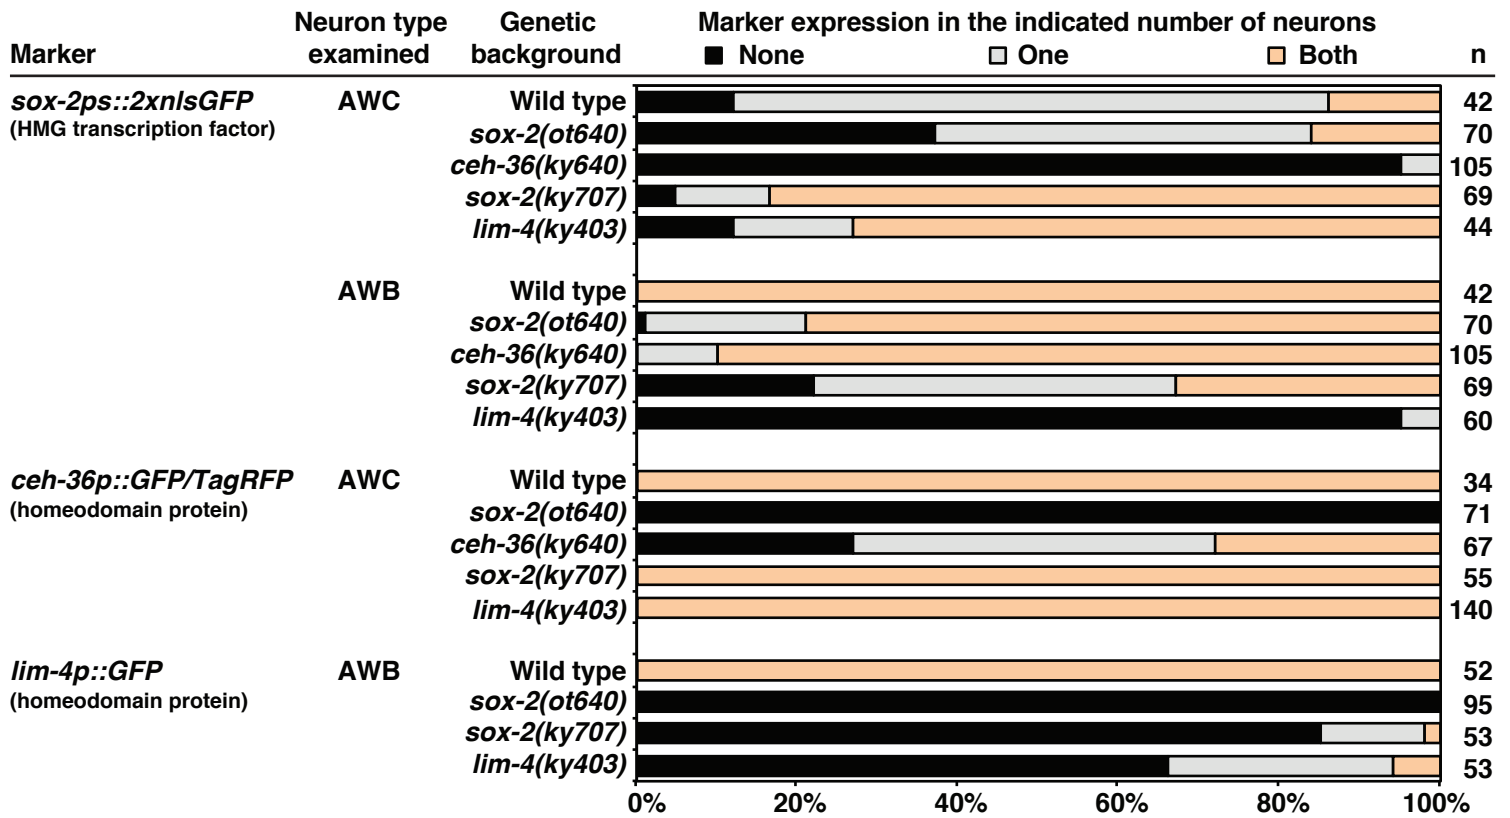

# Appendix Figure S3

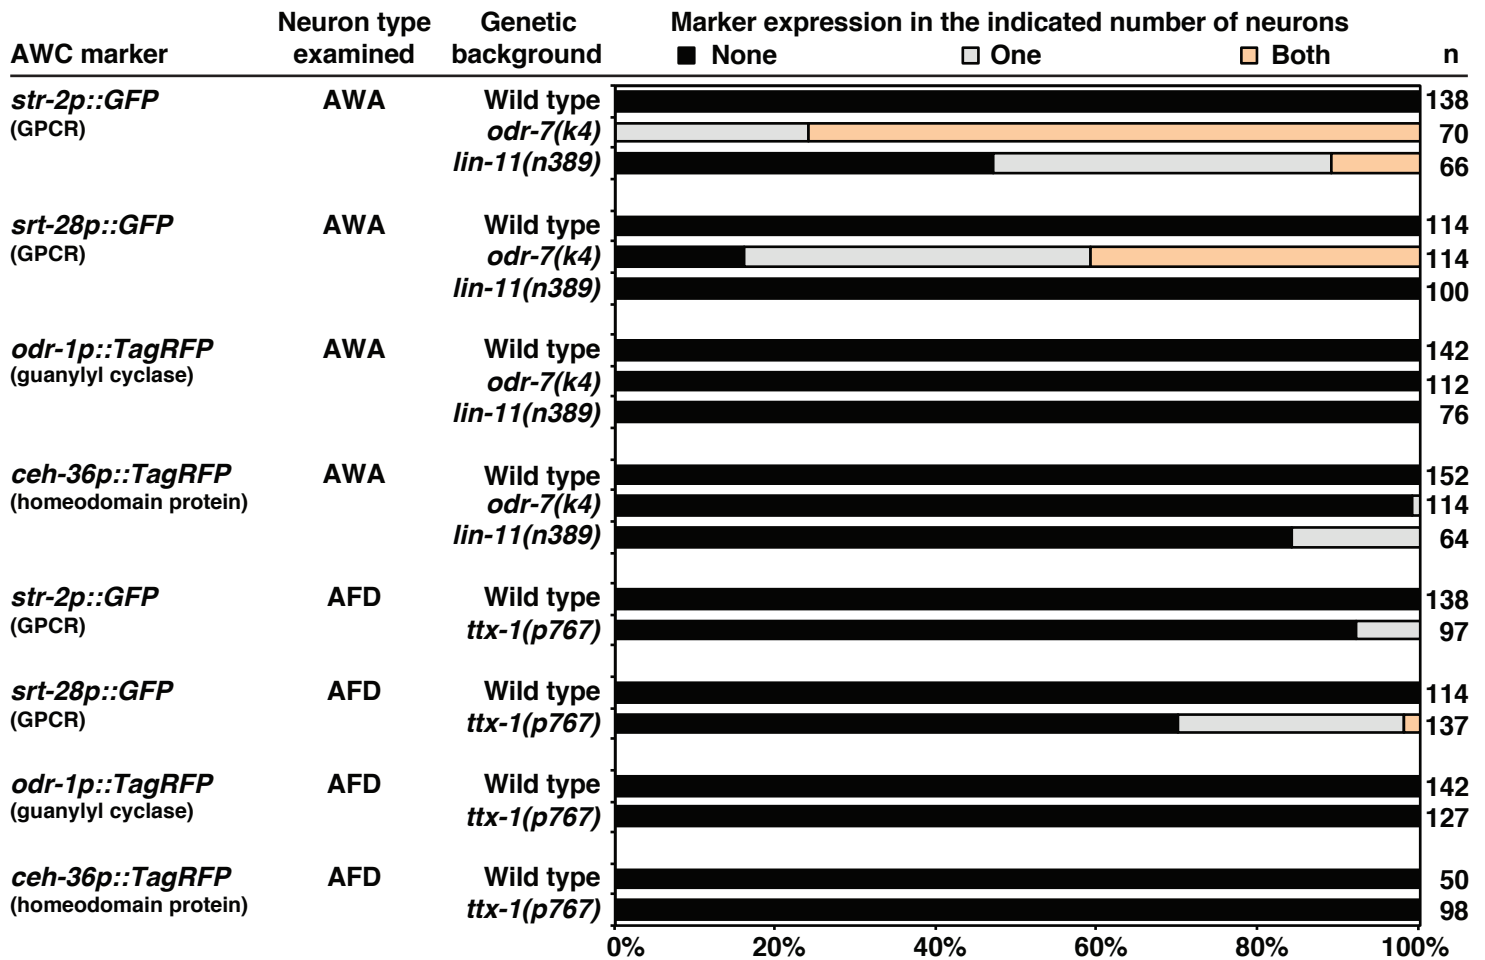

## Appendix Figure Legends

### Appendix Figure S1. SOX-2, CEH-36, and LIM-4 specifically bind to CEH-36/SOX-2 and LIM-4/SOX-2 sites.

(A) EMSA assays of 6xHis-tagged SOX-2 with an IRDye-labeled CSwt probe containing CEH-36/SOX-2 adjacent sites. 2x, 5x, 10x, or 25x cold competitor was added in lanes 3-6 (CSwt) and lanes 7-10 (CSm with a mutated SOX-2 site).

(B) EMSA assays of 6xHis-tagged SOX-2 with an IRDye-labeled LSwt probe containing LIM-4/SOX-2 adjacent sites. 2x, 5x, 10x, or 25x cold competitor was added in lanes 3-6 (LSwt) and lanes 7-10 (LSm with a mutated SOX-2 site).

(C) EMSA assays of 6xHis-tagged CEH-36 with an IRDye-labeled CSwt probe. 5x, 7.5x, 10x, or 15x cold competitor was added in lanes 3-6 (CSwt) and lanes 7-10 (CmS with a mutated CEH-36 site).

(D) EMSA assays of 6xHis-tagged LIM-4 with an IRDye-labeled LSwt probe. 1x, 2x, 3x, or 4x cold competitor was added in lanes 3-6 (LSwt) and lanes 7-10 (LmS with a mutated LIM-4 site).

### Appendix Figure S2. Expression of *sox-2*, *ceh-36*, and *lim-4* markers in *sox-2*, *ceh-36*, and *lim-4* mutants

Animals were scored in the first larval stage. n = total number of animals.

### Appendix Figure S3. Expression of AWC markers in *odr-7*, *lin-11*, and *ttx-1* mutants. Animals were scored in the adult stage. n = total number of animals.

## Appendix Supplemental Materials and Methods

### Strains and transgenes

#### Balanced mutant

*sox-2(ot640null); otEx4454 [sox-2 fosmid::mCherry; elt-2p::DsRed]* (Vidal et al, 2015)

#### Mutants

*nsy-5(ky634) I* (Chuang et al, 2007)

*lin-11(n389)* I (Ferguson & Horvitz, 1985)  
*nsy-1(ky542)* II (Sagasti et al, 2001)  
*tir-1(tm3036)* III (Chang et al, 2011)  
*tir-1(ky648gf)* III (Chang et al, 2011)  
*unc-36(e251)* III (Brenner, 1974)  
*unc-43(n498gf)* IV (Park & Horvitz, 1986)  
*nsy-4(ky627)* IV (Vanhoven et al, 2006)  
*nsy-7(ky630)* IV (Lesch et al, 2009)  
*unc-76(e911)* V (Bloom & Horvitz, 1997)  
*ttx-1(p767)* V (Satterlee et al, 2001)  
*mls-2(cc615)* X (Jiang et al, 2005)  
*odr-1(n1936)* X (Bargmann et al, 1993)  
*odr-7(ky4)* X (Sengupta et al, 1994)  
*sox-2(ky707)* X (this study)  
*lim-4(ky403)* X (Sagasti et al, 1999)  
*ceh-36(ky640)* X (Lanjuin et al, 2003)

Integrated transgenes

| Integrated transgenes                                                                    | Figures             |
|------------------------------------------------------------------------------------------|---------------------|
| <i>kyIs140</i> [ <i>str-2p::GFP; lin-15(+)</i> ] I (Troemel et al, 1999)                 | 1,3,EV3,Appendix S3 |
| <i>kyIs408</i> [ <i>str-2p::DsRed; srsx-3p::GFP; elt-2::GFP</i> ] II (Lesch et al, 2009) | 1,5                 |
| <i>vyIs68</i> [ <i>str-2p::TagRFP; srsx-3p::GFP</i> ] III (Cochella et al, 2014)         | 5                   |
| <i>vyIs56</i> [ <i>odr-1p::TagRFP</i> ] III                                              | EV1,6,Appendix S3   |
| <i>mgIs18</i> [ <i>ttx-3p::GFP</i> ] IV (Altun-Gultekin et al, 2001)                     | EV1                 |
| <i>ynIs66</i> [ <i>flp-7p::GFP</i> ] IV (Kim & Li, 2004)                                 | EV1, EV4            |
| <i>vyIs59</i> [ <i>str-2p::TagRFP; str-1p::GFP</i> ] V                                   | 5                   |
| <i>otIs3</i> [ <i>gcy-7p::GFP; lin-15(+)</i> ] V (Chang et al, 2003)                     | EV1                 |

|                                                                                     |                    |
|-------------------------------------------------------------------------------------|--------------------|
| <i>ntl1</i> [ <i>gcy-5p::GFP</i> ] V (Chang et al, 2003)                            | EV1                |
| <i>oyIs14</i> [ <i>sra-6p::GFP; lin-15(+)</i> ] V (Sarafi-Reinach et al, 2001)      | EV1                |
| <i>oyIs17</i> [ <i>gcy-8p::GFP</i> ] V (Satterlee et al, 2001)                      | EV1                |
| <i>kyIs84</i> [ <i>srg-2p::GFP</i> ] V                                              | EV1                |
| <i>otIs92</i> [ <i>flp-10p::GFP</i> ] V (Mehta et al, 2004)                         | EV1                |
| <i>vyIs55</i> [ <i>str-2p::TagRFP; str-1p::GFP</i> ] X                              | 1                  |
| <i>mgIs19</i> [ <i>lim-4p::GFP; pRF4 rol-6(su1006)</i> ] X(Sagasti et al, 1999)     | 1,5, Appendix S2   |
| <i>vyIs66</i> [ <i>sox-2ps::2xnlGFP; ofm-1p::DsRed</i> ] X                          | 6,Appendix S2      |
| <i>vyIs64</i> [ <i>odr-3p::2xnlGFP; ofm-1p::DsRed</i> ] X                           | EV4                |
| <i>otIs264</i> [ <i>ceh-36p::TagRFP</i> ] (Patel et al, 2012)                       | 1,5,S7,Appendix S3 |
| <i>otIs185</i> [ <i>ceh-36p::GFP::cog-1 3'; rol-6(su1006)</i> ] (Sarin et al, 2007) | Appendix S1        |
| <i>otIs392</i> [ <i>eat-4p6::GFP; ttx-3p::DsRed</i> ] (Serrano-Saiz et al, 2013)    | 1,5,EV4            |
| <i>xrIs32</i> [ <i>mec-4p::lin-14; odr-1p::GFP</i> ]                                | 5,EV4              |
| <i>kyIs170</i> [ <i>srh-220::GFP; lin-15(+)</i> ](Chang et al, 2006)                | EV1                |
| <i>pkIs586</i> [ <i>gpa-9p::GFP</i> ] (Kim et al, 2010)                             | EV1                |
| <i>otIs393</i> [ <i>ift-20p::2xnlTagRFP</i> ]                                       | EV4                |
| <i>otIs356</i> [ <i>rab-3p::2xnlTagRFP</i> ]                                        | EV4                |

### Extrachromosomal arrays

| Extrachromosomal arrays                                                                                                           | Figures |
|-----------------------------------------------------------------------------------------------------------------------------------|---------|
| <i>kyEx388</i> [ <i>odr-3p::lim-4; pRF4 rol-6(su1006)</i> ] (Sagasti et al, 1999)                                                 | 1       |
| <i>vyEx1513</i> [ <i>odr-3p::lim-4 (20ng/ul); ofm-1p::DsRed (30ng/ul)</i> ]                                                       | 1       |
| <i>vyEx2502, 2503, 2505</i> [ <i>sox-2p::sox-2 (2 ng/μl); odr-1p::DsRed (15 ng/μl);</i>                                           | 2,5,6   |
| <i>vyEx2562-2564</i> [ <i>sox-2ps::sox-2 (3 ng/μl); odr-1p::DsRed (15 ng/μl); ofm-1p::DsRed (30 ng/μl)</i> ]                      | 2       |
| <i>vyEx2583-2585</i> [ <i>sox-2ps::mSox2 (3 ng/μl); ofm-1p::DsRed (30ng/μl)</i> ]                                                 | 2       |
| <i>vyEx1736-1739</i> [ <i>sox-2ps::mSox1 (3 ng/ul); ofm-1p::DsRed (30 ng/ul)</i> ]                                                | 2       |
| <i>vyEx1740-1742</i> [ <i>sox-2ps::mSox3 (3 ng/ul); ofm-1p::DsRed (30 ng/ul)</i> ]                                                | 2       |
| <i>vyEx2501, 2506, 2507</i> [ <i>sox-2p::sox-2<sup>G73E</sup> (5 ng/μl); odr-1p::DsRed (15 ng/μl); ofm-1p::DsRed (30 ng/μl)</i> ] | 2       |

|                                                                                                                                                        |                 |
|--------------------------------------------------------------------------------------------------------------------------------------------------------|-----------------|
| <i>kyEx599</i> [ <i>odr-3p::nsy-1(gf)</i> ; <i>myo-3p::DsRed</i> ] (Chuang & Bargmann, 2005; Sagasti et al, 2001)                                      | 3               |
| <i>vyEx499</i> [ <i>odr-3p::calbindin D28K (100ng/ul)</i> ; <i>odr-1p::DsRed (12ng/ul)</i> ; <i>ofm-1p::DsRed (30ng/ul)</i> ] (Schumacher et al, 2012) | 3               |
| <i>vyEx2521</i> [ <i>odr-3p::sox-2 (5 ng/ul)</i> ; <i>odr-1p::DsRed (15 ng/ul)</i> ; <i>ofm-1p::DsRed (30 ng/ul)</i> ]                                 | 5               |
| <i>vyEx2512, 2515, 2516</i> [ <i>odr-3p::sox-2<sup>G73E</sup> (5 ng/ul)</i> ; <i>odr-1p::DsRed (15 ng/ul)</i> ; <i>ofm-1p::DsRed (30 ng/ul)</i> ]      | 5               |
| <i>vyEx2607, 2608, vy2612, vy2614</i> [ <i>odr-3p::ceh-36 (30 ng/ul)</i> ; <i>ofm-1p::DsRed (30 ng/ul)</i> ]                                           | 5               |
| <i>vyEx1396, 1397</i> [ <i>odr-1p(-1027-1)::GFP (50ng/ul)</i> ; <i>ofm-1p::DsRed (30ng/ul)</i> ]                                                       | 7               |
| <i>vyEx1616, 1617</i> [ <i>odr-1p(-393-1)::GFP (50ng/ul)</i> ; <i>ofm-1p::DsRed (30ng/ul)</i> ]                                                        | 7               |
| <i>vyEx1678, 1679</i> [ <i>odr-1p(-393-1LmS)::GFP (50ng/ul)</i> ; <i>ofm-1p::DsRed</i> ]                                                               | 7               |
| <i>vyEx1723, 1724</i> [ <i>odr-1p(-393-1LSm)::GFP (50ng/ul)</i> ; <i>ofm-1p::DsRed</i> ]                                                               | 7               |
| <i>vyEx1609, 1610</i> [ <i>odr-1p(-393-170)::GFP (50ng/ul)</i> ; <i>ofm-1p::DsRed</i> ]                                                                | 7               |
| <i>vyEx1632, 1643</i> [ <i>odr-1p(-393-170CmS)::GFP (50ng/ul)</i> ; <i>ofm-1p::DsRed</i> ]                                                             | 7               |
| <i>vyEx1650, 1657</i> [ <i>odr-1p(-393-170CSm)::GFP (50ng/ul)</i> ; <i>ofm-1p::DsRed</i> ]                                                             | 7               |
| <i>kyEx3187</i> [ <i>srt-28p::GFP</i> ; <i>elt-2p::mCherry</i> ] (Lesch & Bargmann, 2010)                                                              | EV1,Appendix S3 |
| PY4881 [ <i>sru-38p::GFP</i> ; <i>ofm-1p::RFP</i> ] (Nokes et al, 2009)                                                                                | EV1,EV4         |
| <i>kyEx3208</i> [ <i>odr-7p::GFP (15ng/ul)</i> ; <i>ofm-1p::DsRed (15ng/ul)</i> ]                                                                      | EV1             |
| <i>adEx1290</i> [ <i>gcy-33p::GFP</i> ] (Yu et al, 1997)                                                                                               | EV1             |
| PY2978 [ <i>srv-33p::RFP</i> ] (Nokes et al, 2009)                                                                                                     | EV1             |
| <i>kyEx329</i> [ <i>srh-142p::GFP</i> ; <i>pRF4 rol-6(su1006)</i> ]                                                                                    | EV1             |

## Plasmid construction

### *sox-2p::sox-2*

A 7046 PCR fragment amplified from wild-type worm genomic DNA, containing 4756 bp of the *sox-2* promoter region, 1494 bp of the *sox-2* coding region, and 796 bp of the *sox-2* 3' UTR.

### *sox-2p::sox-2<sup>G73E</sup>*



A 7046 bp fragment amplified from *sox-2(ky707)* mutant genomic DNA.

*sox-2ps::sox-2*

A 5155 bp PCR fragment amplified from wild-type worm genomic DNA, containing 2865 bp of the *sox-2* promoter region, 1494 bp of the *sox-2* coding region, and 796 bp of the *sox-2* 3' UTR.

*sox-2ps::mSox2*

*mSox2* was amplified from mouse brain cDNA and subcloned into a *sox-2ps* vector.

*sox-2ps::mSox1*

The *mSox1* fragment was amplified from pMXs-ms-Sox1 (Nakagawa et al, 2008), a gift from Shinya Yamanaka (Addgene plasmid # 50778), and cloned into a *sox-2ps* vector.

*sox-2ps::mSox3*

The *mSox3* fragment (NP\_033263) was generated from postnatal day 1 mouse brain cDNA and pMXs-ms-Sox3 (Nakagawa et al, 2008), a gift from Shinya Yamanaka (Addgene plasmid # 50779), and cloned into a *sox-2ps* vector.

*odr-3p::2xnlGFP*

A *str-2p::2xnl* DNA fragment was digested from *str-2p::2xnlTagRFP* (Chang et al, 2011) and subcloned into a GFP vector to make *str-2p::2xnlGFP*. A *2xnlGFP* fragment was then digested from *str-2p::2xnlGFP* and subcloned into an *odr-3p* vector (Roayaie et al, 1998).

*sox-2ps::2xnlGFP*

A *2xnlGFP* fragment was digested from *str-2p::2xnlGFP* (see above) and subcloned into a *sox-2ps* vector.

*odr-3p::sox-2*

A 1491 bp of *sox-2* coding region was amplified from wild-type genomic DNA and subcloned into an *odr-3p* vector (Roayaie et al, 1998).

*odr-3p::sox-2<sup>G73E</sup>*

*sox-2*<sup>G73E</sup> coding regions were amplified from *sox-2(ky707)* mutant genomic DNA and subcloned into an *odr-3p* vector (Roayaie et al, 1998).

*odr-3p::ceh-36*

A 771 bp of *ceh-36* coding region was amplified from worm cDNA and subcloned into an *odr-3p* vector (Roayaie et al, 1998).

*odr-3p::lim-4*

A 1065 bp of *lim-4* coding region was amplified from worm cDNA and subcloned into an *odr-3p* vector (Roayaie et al, 1998).

*CMVp::sox-2*

An 849 bp of *sox-2* coding region was amplified from worm cDNA and cloned into pcDNA6 V5 6xHis A (Invitrogen).

*CMVp::ceh-36*

A 771 bp of *ceh-36* coding region was amplified from worm cDNA and cloned into pcDNA6 V5 6xHis A (Invitrogen).

*CMVp::lim-4*

A 1065 bp of *lim-4* coding region was amplified from worm cDNA and cloned into pcDNA6 V5 6xHis A (Invitrogen).

*CMVp::sox-2*<sup>G73E</sup>

*sox-2*<sup>G73E</sup> was generated by site directed mutagenesis of *sox-2* cDNA and subcloned into pcDNA6 V5 6xHis A.

*odr-1p::luciferase*

A 1027 bp PCR fragment of *odr-1* promoter was subcloned into the pGL4.23[luc2/minP] vector (Promega).

*odr-1p::GFP*

To make *odr-1p(-1027-1)::GFP*, the *mir-71* promoter of *mir-71p::GFP* (Hsieh et al, 2012) was replaced with a 1027bp *odr-1* promoter fragment amplified from N2 genomic DNA. Other GFP reporter constructs driven by shorter *odr-1* promoters were generated in a similar manner. Mutations of binding sites in the *odr-1* promoter GFP reporter constructs were generated using a QuikChange II XL site directed mutagenesis kit (Stratagene). All constructs were verified by DNA sequencing.

### **Germ line transformation**

To generate transgenic strains, DNA constructs were injected into the syncytial gonad of adult worms as previously described (Mello & Fire, 1995).

### **Appendix Supplemental References**

Altun-Gultekin Z, Andachi Y, Tsalik EL, Pilgrim D, Kohara Y, Hobert O (2001) A regulatory cascade of three homeobox genes, *ceh-10*, *ttx-3* and *ceh-23*, controls cell fate specification of a defined interneuron class in *C. elegans*. *Development* **128**: 1951-1969

Bargmann CI, Hartweg E, Horvitz HR (1993) Odorant-selective genes and neurons mediate olfaction in *C. elegans*. *Cell* **74**: 515-527

Bloom L, Horvitz HR (1997) The *Caenorhabditis elegans* gene *unc-76* and its human homologs define a new gene family involved in axonal outgrowth and fasciculation. *Proc Natl Acad Sci U S A* **94**: 3414-3419

Brenner S (1974) The genetics of *Caenorhabditis elegans*. *Genetics* **77**: 71-94

Chang C, Adler CE, Krause M, Clark SG, Gertler FB, Tessier-Lavigne M, Bargmann CI (2006) MIG-10/lamellipodin and AGE-1/PI3K promote axon guidance and outgrowth in response to slit and netrin. *Curr Biol* **16**: 854-862

Chang C, Hsieh YW, Lesch BJ, Bargmann CI, Chuang CF (2011) Microtubule-based localization of a synaptic calcium-signaling complex is required for left-right neuronal asymmetry in *C. elegans*.

*Development* **138**: 3509-3518

Chang S, Johnston RJ, Jr., Hobert O (2003) A transcriptional regulatory cascade that controls left/right asymmetry in chemosensory neurons of *C. elegans*. *Genes & development* **17**: 2123-2137

Chuang CF, Bargmann CI (2005) A Toll-interleukin 1 repeat protein at the synapse specifies asymmetric odorant receptor expression via ASK1 MAPKKK signaling. *Genes & development* **19**: 270-281

Chuang CF, Vanhoven MK, Fetter RD, Verselis VK, Bargmann CI (2007) An innexin-dependent cell network establishes left-right neuronal asymmetry in *C. elegans*. *Cell* **129**: 787-799

Cochella L, Tursun B, Hsieh YW, Galindo S, Johnston RJ, Chuang CF, Hobert O (2014) Two distinct types of neuronal asymmetries are controlled by the *Caenorhabditis elegans* zinc finger transcription factor *die-1*. *Genes & development* **28**: 34-43

Ferguson EL, Horvitz HR (1985) Identification and characterization of 22 genes that affect the vulval cell lineages of the nematode *Caenorhabditis elegans*. *Genetics* **110**: 17-72

Hsieh YW, Chang C, Chuang CF (2012) The microRNA mir-71 inhibits calcium signaling by targeting the TIR-1/Sarm1 adaptor protein to control stochastic L/R neuronal asymmetry in *C. elegans*. *PLoS genetics* **8**: e1002864

Jiang Y, Horner V, Liu J (2005) The HMX homeodomain protein MLS-2 regulates cleavage orientation, cell proliferation and cell fate specification in the *C. elegans* postembryonic mesoderm. *Development* **132**: 4119-4130

Kim K, Kim R, Sengupta P (2010) The HMX/NKX homeodomain protein MLS-2 specifies the identity of the AWC sensory neuron type via regulation of the *ceh-36* Otx gene in *C. elegans*. *Development* **137**: 963-974

Kim K, Li C (2004) Expression and regulation of an FMRFamide-related neuropeptide gene family in *Caenorhabditis elegans*. *J Comp Neurol* **475**: 540-550

Lanjuin A, VanHoven MK, Bargmann CI, Thompson JK, Sengupta P (2003) Otx/otd homeobox genes specify distinct sensory neuron identities in *C. elegans*. *Developmental cell* **5**: 621-633

Lesch BJ, Bargmann CI (2010) The homeodomain protein hmbx-1 maintains asymmetric gene expression in adult *C. elegans* olfactory neurons. *Genes & development* **24**: 1802-1815

Lesch BJ, Gehrke AR, Bulyk ML, Bargmann CI (2009) Transcriptional regulation and stabilization of left-right neuronal identity in *C. elegans*. *Genes & development* **23**: 345-358

Mehta N, Loria PM, Hobert O (2004) A genetic screen for neurite outgrowth mutants in *Caenorhabditis elegans* reveals a new function for the F-box ubiquitin ligase component LIN-23. *Genetics* **166**: 1253-1267

Mello C, Fire A (1995) DNA transformation. *Methods Cell Biol* **48**: 451-482

Nakagawa M, Koyanagi M, Tanabe K, Takahashi K, Ichisaka T, Aoi T, Okita K, Mochiduki Y, Takizawa N, Yamanaka S (2008) Generation of induced pluripotent stem cells without Myc from mouse and human fibroblasts. *Nature biotechnology* **26**: 101-106

Nokes EB, Van Der Linden AM, Winslow C, Mukhopadhyay S, Ma K, Sengupta P (2009) Cis-regulatory mechanisms of gene expression in an olfactory neuron type in *Caenorhabditis elegans*. *Developmental dynamics : an official publication of the American Association of Anatomists* **238**: 3080-3092

Park EC, Horvitz HR (1986) Mutations with dominant effects on the behavior and morphology of the nematode *Caenorhabditis elegans*. *Genetics* **113**: 821-852

Patel T, Tursun B, Rahe DP, Hobert O (2012) Removal of Polycomb repressive complex 2 makes *C. elegans* germ cells susceptible to direct conversion into specific somatic cell types. *Cell Rep* **2**: 1178-1186

Roayaie K, Crump JG, Sagasti A, Bargmann CI (1998) The G alpha protein ODR-3 mediates olfactory and nociceptive function and controls cilium morphogenesis in *C. elegans* olfactory neurons. *Neuron* **20**: 55-67

Sagasti A, Hisamoto N, Hyodo J, Tanaka-Hino M, Matsumoto K, Bargmann CI (2001) The CaMKII UNC-43 activates the MAPKKK NSY-1 to execute a lateral signaling decision required for asymmetric olfactory neuron fates. *Cell* **105**: 221-232

Sagasti A, Hobert O, Troemel ER, Ruvkun G, Bargmann CI (1999) Alternative olfactory neuron fates are specified by the LIM homeobox gene *lim-4*. *Genes & development* **13**: 1794-1806

Sarafi-Reinach TR, Melkman T, Hobert O, Sengupta P (2001) The *lin-11* LIM homeobox gene specifies olfactory and chemosensory neuron fates in *C. elegans*. *Development* **128**: 3269-3281

Sarin S, O'Meara MM, Flowers EB, Antonio C, Poole RJ, Didiano D, Johnston RJ, Jr., Chang S, Narula S, Hobert O (2007) Genetic screens for *Caenorhabditis elegans* mutants defective in left/right asymmetric neuronal fate specification. *Genetics* **176**: 2109-2130

Satterlee JS, Sasakura H, Kuhara A, Berkeley M, Mori I, Sengupta P (2001) Specification of thermosensory neuron fate in *C. elegans* requires *ttx-1*, a homolog of *otd/Otx*. *Neuron* **31**: 943-956

Schumacher JA, Hsieh YW, Chen S, Pirri JK, Alkema MJ, Li WH, Chang C, Chuang CF (2012) Intercellular calcium signaling in a gap junction-coupled cell network establishes asymmetric neuronal fates in *C. elegans*. *Development* **139**: 4191-4201

Sengupta P, Colbert HA, Bargmann CI (1994) The *C. elegans* gene *odr-7* encodes an olfactory-specific member of the nuclear receptor superfamily. *Cell* **79**: 971-980

Serrano-Saiz E, Poole RJ, Felton T, Zhang F, De La Cruz ED, Hobert O (2013) Modular Control of Glutamatergic Neuronal Identity in *C. elegans* by Distinct Homeodomain Proteins. *Cell* **155**: 659-673

Troemel ER, Sagasti A, Bargmann CI (1999) Lateral signaling mediated by axon contact and calcium entry regulates asymmetric odorant receptor expression in *C. elegans*. *Cell* **99**: 387-398

Vanhoven MK, Bauer Huang SL, Albin SD, Bargmann CI (2006) The claudin superfamily protein *nsy-4* biases lateral signaling to generate left-right asymmetry in *C. elegans* olfactory neurons. *Neuron* **51**: 291-302

Vidal B, Santella A, Serrano-Saiz E, Bao Z, Chuang CF, Hobert O (2015) *C. elegans* SoxB genes are dispensable for embryonic neurogenesis but required for terminal differentiation of specific neuron types. *Development* **142**: 2464-2477

Yu S, Avery L, Baude E, Garbers DL (1997) Guanylyl cyclase expression in specific sensory neurons: a new family of chemosensory receptors. *Proc Natl Acad Sci U S A* **94**: 3384-3387
